# Supplementary material
Source: Springer Nature journal article supplement (https://www.springerprofessional.de/resource/supplementary/13638_2011_282_MOESM4_ESM.pdf/11897534)

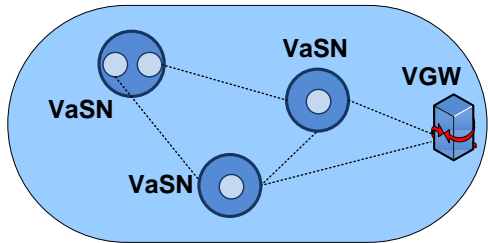

**VSN-Aware WSI**

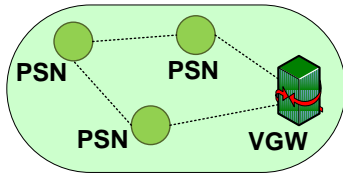

**Proprietary WSI**

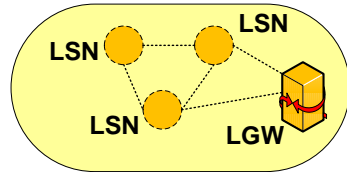

**Legacy WSI**

Supplement: MOESM4 [file 11897534]
